# Supplementary material for: Functional Delineation of a Protein–Membrane Interaction Hotspot Site on the HIV-1 Neutralizing Antibody 10E8
Source: MDPI journal article supplement (doi:10.3390/ijms231810767), 2022-09-15
Supplement: s1 [file s1]

## **SUPPLEMENTARY MATERIALS**

### **FUNCTIONAL DELINEATION OF A PROTEIN-MEMBRANE INTERACTION HOTSPOT SITE ON THE HIV-1 NEUTRALIZING ANTIBODY 10E8**

Sara Insausti<sup>1,2</sup>, Miguel Garcia-Porras<sup>1</sup>, Johana Torralba<sup>1,2</sup>, Izaskun Morillo<sup>1</sup>, Ander Ramos-Caballero<sup>1</sup>, Igor de la Arada<sup>1</sup>, Beatriz Apellaniz<sup>3</sup>, Jose M.M. Caaveiro<sup>4</sup>, Pablo Carravilla<sup>5</sup>, Christian Eggeling<sup>5,6,7</sup>, Edurne Rujas<sup>8,9,10\*</sup>, and Jose L. Nieva<sup>1,2\*</sup>

<sup>1</sup>Instituto Biofisika (CSIC-UPV/EHU), University of the Basque Country (UPV/EHU), PO Box 644, 48080 Bilbao, Spain.

<sup>2</sup>Department of Biochemistry and Molecular Biology, University of the Basque Country (UPV/EHU), PO Box 644, 48080 Bilbao, Spain.

<sup>3</sup>Department of Physiology, Faculty of Pharmacy, University of the Basque Country (UPV/EHU), Paseo de la Universidad, 7, 01006 Vitoria-Gasteiz, Spain.

<sup>4</sup>Laboratory of Global Healthcare, School of Pharmaceutical Sciences, Kyushu University, Fukuoka 819-0395, Japan

<sup>5</sup>Leibniz Institute of Photonic Technology e.V., Jena, Germany

<sup>6</sup>Faculty of Physics and Astronomy, Institute of Applied Optics and Biophysics, Friedrich Schiller University Jena, Jena, Germany

<sup>7</sup>Medical Research Council Human Immunology Unit, Weatherall Institute of Molecular Medicine, University of Oxford, Oxford, United Kingdom

<sup>8</sup>Ikerbasque, Basque Foundation for Science, 48013, Bilbao, Spain

<sup>9</sup>Pharmacokinetic, Nanotechnology and Gene Therapy Group, Faculty of Pharmacy, University of the Basque Country UPV/EHU, 01006 Vitoria-Gasteiz, Spain

<sup>10</sup>Bioaraba, Microbiology, Infectious Disease, Antimicrobial Agents, and Gene Therapy, 01006 Vitoria-Gasteiz, Spain

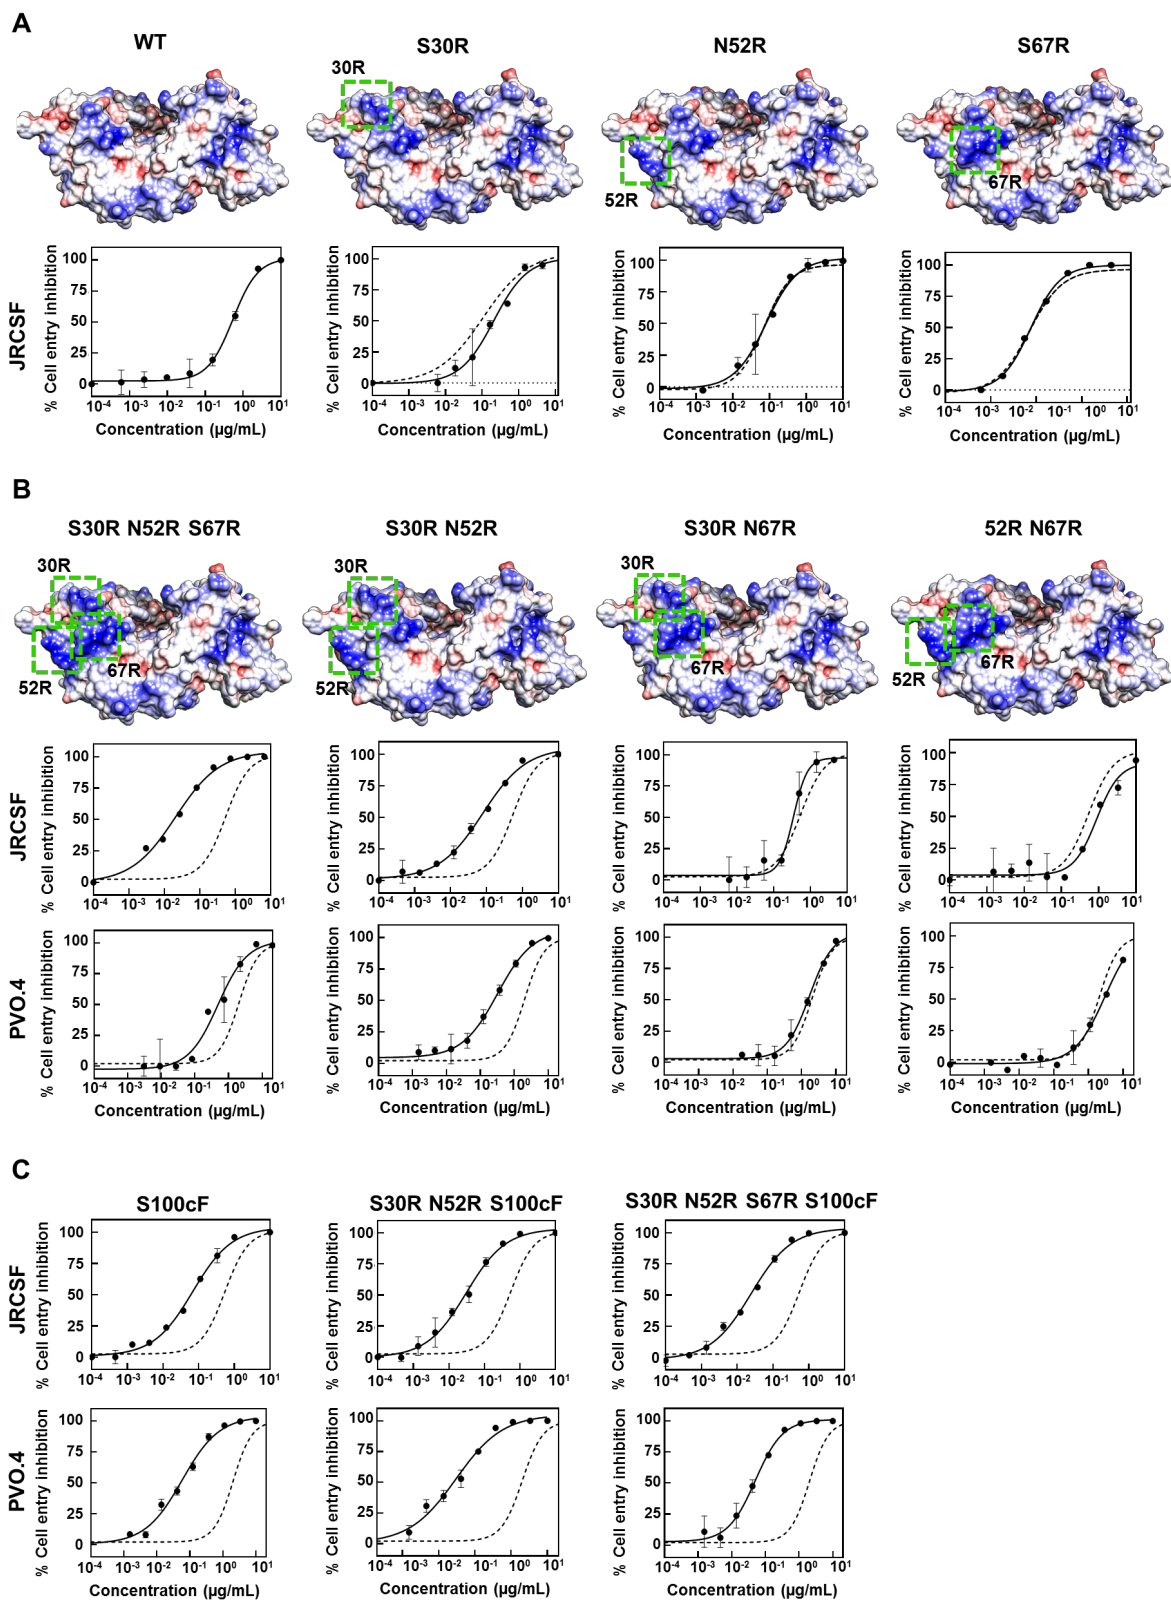

**Supplementary Figure S1 (previous page): Cell-entry inhibition by 10E8 Fab mutants.** Surface density charge representation and neutralization curves of individual (A) and combined (B) Arg mutants. The regions where the mutations are located are highlighted with a green box. C) Neutralization curves of S100cF substitution-containing mutants. 10E8-WT Fab is shown as a dotted line in each plot for comparison.

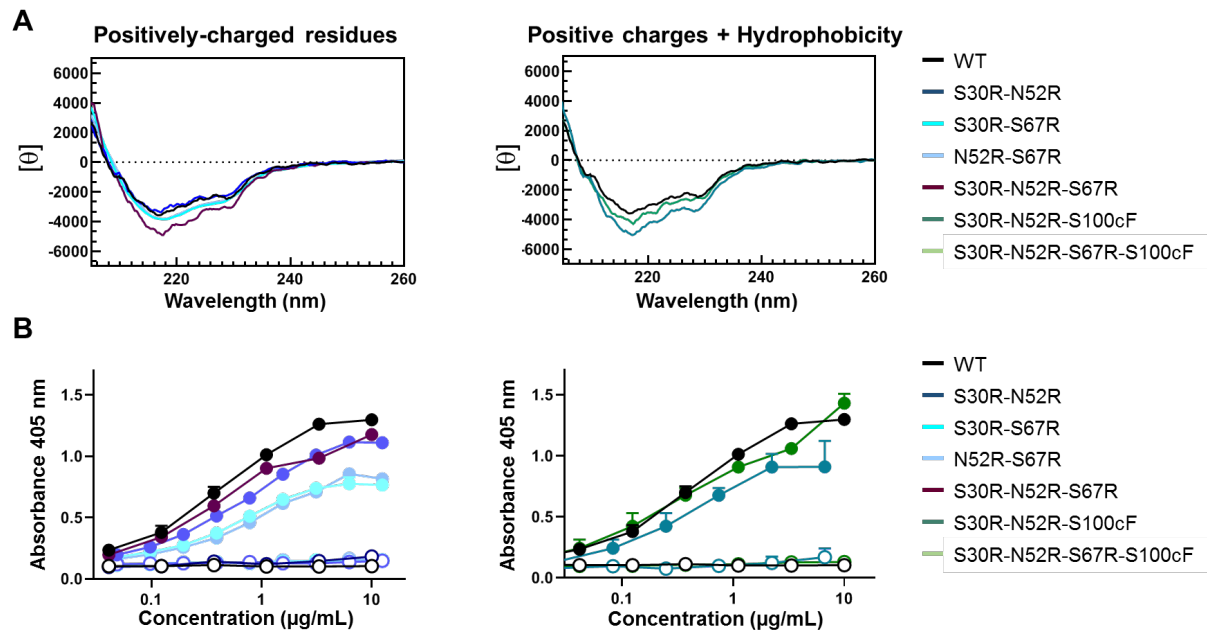

**Supplementary Figure S2: Characterization of 10E8 mutant Fabs.** (A) Secondary structure by CD and (B) ELISAs to determine functional binding to MPER<sub>671-693</sub> epitope peptide (filled symbols) and mutMPER<sub>671-693</sub> peptide (empty symbols), the latter included as a control for binding specificity.

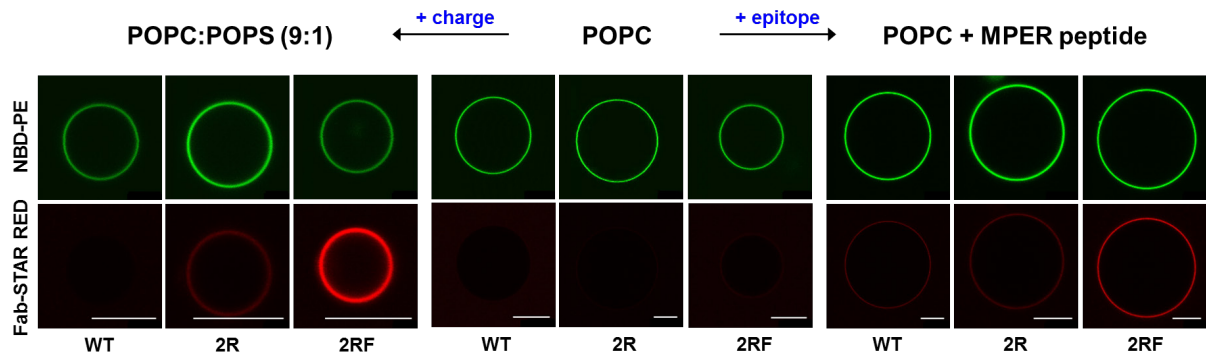

**Supplementary Figure S3:** Representative images of POPC vesicle binding experiments in the absence (middle) and presence (right) of epitope, and in vesicles including the anionic phospholipid POPS without epitope (left). Scale bars, 5  $\mu$ m

**Supplementary Table S1:** Kinetic parameters of binding of Fab 10E8 variants to MPER-TMD<sub>671-709</sub> peptide reconstituted in SLBs

| <b>Fab</b> | <b><math>K_D</math> (M)</b>               | <b><math>k_a</math> (M<sup>-1</sup> s<sup>-1</sup>)</b> | <b><math>k_{off}</math> (s<sup>-1</sup>)</b> |
|------------|-------------------------------------------|---------------------------------------------------------|----------------------------------------------|
| WT         | $1.0 \cdot 10^{-9} \pm 0.3 \cdot 10^{-9}$ | $1.9 \cdot 10^6 \pm 0.3 \cdot 10^6$                     | $1.9 \cdot 10^{-3} \pm 0.6 \cdot 10^{-3}$    |
| 2R         | $1.1 \cdot 10^{-9} \pm 0.4 \cdot 10^{-9}$ | $1.5 \cdot 10^6 \pm 0.5 \cdot 10^6$                     | $1.6 \cdot 10^{-3} \pm 0.1 \cdot 10^{-3}$    |
| 2RF        | $6.3 \cdot 10^{-10} \pm 5 \cdot 10^{-10}$ | $7.3 \cdot 10^5 \pm 6 \cdot 10^5$                       | $5.1 \cdot 10^{-4} \pm 6 \cdot 10^{-4}$      |
